# Supplementary material
Source: publisher figshare collection journal article supplement (https://acs.figshare.com/ndownloader/files/7255964)
Supplement: Supplementary file 1 [file 7255964]

## Sheet: Sheet1
R-Spine Residue	Mutation	Cosmic Sample
RS1	H835L	1054392, 1295349, 1506756, 1853103, 2226914, 2226915, 2226916, 2239175, 2239188, 897189, 920037
RS2	F856L	1780080
	F856S	1098818
RS3	M766T	1179740
	M766V	1651241
RS4	L777P	1651204
	L777Q	1043870, 2226854
